# Supplementary material
Source: MDPI journal article supplement (https://www.mdpi.com/2073-4433/13/6/890)
Supplement: s1 [file s1 › atmosphere-1721070-supplementary-done.pdf]

| Normal distribution test | Red channel |          | Green channel |          | Blue channel |          | Gray channel |          |
|--------------------------|-------------|----------|---------------|----------|--------------|----------|--------------|----------|
|                          | <i>H</i>    | <i>P</i> | <i>H</i>      | <i>P</i> | <i>H</i>     | <i>P</i> | <i>H</i>     | <i>P</i> |
| Lilliefors test          | 1           | 0.001    | 1             | 0.001    | 1            | 0.001    | 1            | 0.001    |
| Jarque-Bera test         | 1           | 0.001    | 1             | 0.001    | 1            | 0.001    | 1            | 0.001    |

**Supplementary Table S1.** Normal test of color distribution of BFH population canopy ( $n=117$ ). The *Lillietest* and *JBtest* functions of MATLAB software were used to carry out Lilliefors Test and JarqueBera Test on the distribution of the double precision array of red, green and blue channels, as well as gray-level images of the canopy color images. The return values of *H* were all 1, indicating that the gradation distribution of canopy color did not accord with normal distribution. The *P* values of the occurrence probability of the event were less than 0.05, and the null hypothesis was rejected as normal distribution. Combined with Figure 1-A, it indicated that the gradation distribution of BFH population canopy was skewed distribution.
